# Supplementary material for: A Proposed Typology of Farming Systems for Assessing Sustainable Livelihood Development Pathways in the Tien Shan Mountains of Kyrgyzstan
Source: MDPI journal article supplement (doi:10.3390/land13020126), 2024-01-23
Supplement: s1 [file s1]

**Table S1** Non-collinear variables used in hierarchical agglomerative cluster analysis

| Variables            |                              | Elevation of village | Cultivated area | Pasturing period | Off-farm income |
|----------------------|------------------------------|----------------------|-----------------|------------------|-----------------|
| Elevation of village | Pearson Correlation          | 1.00                 | 0.096           | 0.011            | -0.047          |
|                      | Sig. (2-tailed) <sup>1</sup> |                      | 0.144           | 0.867            | 0.477           |
|                      | N                            | 233                  | 233             | 233              | 233             |
| Cultivated area      | Pearson Correlation          | 0.096                | 1.00            | -0.017           | -0.024          |
|                      | Sig. (2-tailed)              | 0.144                |                 | 0.799            | 0.721           |
|                      | N                            | 233                  | 233             | 233              | 233             |
| Grazing period       | Pearson Correlation          | 0.011                | -0.017          | 1.00             | 0.051           |
|                      | Sig. (2-tailed)              | 0.867                | 0.799           |                  | 0.435           |
|                      | N                            | 233                  | 233             | 233              | 233             |
| Off-farm income      | Pearson Correlation          | -0.047               | -0.024          | 0.051            | 1.00            |
|                      | Sig. (2-tailed)              | 0.477                | 0.721           | 0.435            |                 |
|                      | N                            | 233                  | 233             | 233              | 233             |

<sup>1</sup>The Sig. (2-Tailed) values are >0.05 indicating no statistically significant correlations among variables.

**Table S2** Independent samples test

|                      | Levene's Test for Equality of Variances |      | t-test for Equality of Means |        | Sig. (2-tailed) | Mean Difference | Std. Error Difference | 95% Confidence Interval of the Difference |        |
|----------------------|-----------------------------------------|------|------------------------------|--------|-----------------|-----------------|-----------------------|-------------------------------------------|--------|
|                      | F                                       | Sig. | t                            | df     |                 |                 |                       | Lower                                     | Upper  |
| Elevation of village | 6.50                                    | 0.01 | -18.53                       | 231    | 0.00            | -1.552          | 0.084                 | -1.717                                    | -1.387 |
|                      |                                         |      | -18.65                       | 225.7  | 0.00            | -1.552          | 0.083                 | -1.716                                    | -1.388 |
| Cultivated area      | 25.93                                   | 0.00 | -2.706                       | 231    | 0.00            | -0.352          | 0.13                  | -0.608                                    | -0.096 |
|                      |                                         |      | -2.966                       | 153.57 | 0.00            | -0.352          | 0.119                 | -0.586                                    | -0.117 |
| Grazing period       | 7.71                                    | 0.01 | 6.124                        | 231    | 0.00            | 0.75            | 0.123                 | 0.509                                     | 0.992  |
|                      |                                         |      | 6.512                        | 200.7  | 0.00            | 0.75            | 0.115                 | 0.523                                     | 0.977  |
| Off-farm income      | 6.94                                    | 0.01 | 2.049                        | 231    | 0.042           | 0.268           | 0.131                 | 0.01                                      | 0.526  |
|                      |                                         |      | 1.958                        | 167.0  | 0.052           | 0.268           | 0.137                 | -0.002                                    | 0.539  |
